# Supplementary material for: Prion Infections and Anti-PrP Antibodies Trigger Converging Neurotoxic Pathways
Source: PLoS Pathog. 2015 Feb 24;11(2):e1004662. doi: 10.1371/journal.ppat.1004662 (PMC4339193; doi:10.1371/journal.ppat.1004662)
Supplement: S5 Table — (XLSX) [file ppat.1004662.s013.xlsx]

## Sheet: Microarray and Nanonstring
				fold change >2			fold change -2>			fold change in NS but not MA				fold change in NS but not MA
	fold change >2 in POM1 exposed COCS										fold change > 2RML exposed COCS
Name	8hpe NS	8hpe MA	1dpe NS	1dpe MA	3dpe NS	3dpe MA	7dpeNS	7dpe MA	10dpe NS	10dpe MA	14dpi NS	14dpi MA	25dpi NS	25dpi MA	38dpi NS	38dpi MA	45dpi NS	45dpi MA
Apoh	1.99917		1.36343		1.46561	2.02194	3.30878	3.55742	2.83605	4.57535	1.10924		1.21335		1.13539	2.02111	2.11055	2.1913
Bdnf	1.115		1.80766	3.69832	2.15744	4.17476	2.2689	3.79305	1.39371		-1.10116		1.17201		1.62653		1.88539
C1qa	-1.02472		-1.04461		1.29514		1.56297		1.36332		-1.11043		1.07898		1.36143		1.70189
Cacna2d3	-1.09605		-1.67397		-2.29721		-4.082	-2.04812	-1.84905	-2.04812	-1.01093		-1.10205		-1.35518		-3.72812	-3.48363
Calb1	-1.01887		-1.22346		-1.23823		-1.23503	-2.30308	-1.18278	-2.30308	1.07777		-1.06653		-1.18814		-1.34807
Car4	-1.20504		-1.69535		-3.95804		-14.7753	-21.7731	-1.55594	-21.7731	1.52029		-1.02443		-2.23568	-2.01777	-5.48695	-4.93408
Ccl5	-1.23352		-1.15933		2.04804	2.18261	2.03442		1.72193		-1.21409		1.43384		3.02421	2.71631	5.66829	6.67522
Cd68	1.0163		1.07185		1.26732		1.40979		1.20979		-1.0855		1.02797		1.44487		1.48174
Csf7	-1.05565		-1.16261		1.12289		1.11396		1.459		-1.10622		1.13225		1.13538		1.90106
Cxcl10	-1.09242		2.27174		5.67166		8.42853		6.61412		-1.21055		1.59969		3.74418		9.3086
Cyr61	1.57289		2.36007	2.56971	2.72875	3.12297	7.45765	7.00245	17.8609	15.1394	1.04056		1.19446		1.62186		2.36721	2.16456
Egr3	2.70835	2.90341	7.2583	7.66879	6.09044	8.25603	4.14874	5.46395	2.10786	5.14438	5.72743		1.6792		1.10599		2.24048
Emr1	-1.08221		-1.20405		1.36069		1.6078		1.15238		-1.10176		1.01288		1.45327		1.40169
Fos	3.66199	2.46317	7.43798	3.33592	6.75944	3.26237	7.86547	3.38613	4.44991	3.21739	2.99097	2.14506	1.35747		2.15343		3.04752	2.02359
Fosb	10.4993	6.92477	22.7915	10.6208	14.4782	15.3039	17.1581	12.3393	5.32054	6.97392	3.61335		1.66561		2.85775	2.33122	3.58355	3.92935
Fxyd6	-1.10577		-2.04222	-2.11537	-4.12126	-2.89722	-4.75006	-3.66794	-1.41748	-4.81341	-1.06715		-1.13014		-1.69542		-3.22202	-2.58619
Gabra6	-1.17978		-1.5703		-1.65455		-3.33589	-2.72669	-1.47636	-5.40897	1.17258		-1.02595		-1.47597		-3.59991	-2.65895
Gbp2	-1.16493		1.30425		3.04209	2.79592	3.29581	3.0885	2.56376	3.58504	-1.18071		1.35634		2.54096	2.6801	5.00845
GFAP	1.21049		1.46475		1.85527		2.27717		1.41696		-1.04811		1.27167		1.68612		2.04085
Igfbp1	1.02485		2.01451	2.22986	2.04577	2.32115	1.35079		1.2074		-1.16073		1.56149		1.07265		2.0811
Il1b	-1.37486		1.4582		1.31919		1.59961		2.23113		-1.18834		-1.13159		1.17734		2.49332
Il1r1	1.34417		1.4561		2.06188	2.01337	2.76853	2.43246	2.21812	3.27536	1.10357		1.00183		1.27591		1.64504
Micall2	1.59222		2.03866	2.12313	1.8314	2.11488	2.32729	2.42802	1.842	2.63706	1.10608		1.20736		1.47711		1.98108	2.14672
Nr4a1	4.54653	3.03671	10.7359	7.99543	7.81419	8.45375	8.94165	9.52702	3.07165	6.52558	1.45655		1.30752		2.28914	2.08846	3.65856	3.1437
Nr4a2	3.25624	2.60099	6.60466	4.46965	4.69844	3.4911	5.57689	3.93153	1.725	2.77817	1.35826		1.19277		2.02581	2.01309	2.15371
Nr4a3	2.79459	2.76242	6.03695	5.44589	4.73744	5.25256	4.31599	5.43529	1.94397	3.64346	1.02337		1.10156		1.74828		1.70463
Ptgs2	1.42725		1.74018	2.13534	1.62775		2.7713	3.69618	3.07466	5.02491	-1.09472		-1.2051		1.35763		1.89377
Ptx3	1.23048		1.5963	3.48174	1.60019	3.26297	1.9882	6.06214	2.06777	12.7518	1.17295		1.32187		1.73824		1.25784	3.92004
Rela	1.16553		1.16069		1.23392		1.56049		1.60967		1.0404		1.22153		1.04235		1.43858
Relb	1.27682		2.03072		2.07446	2.2588	2.6489	2.8116	1.95551	2.84778	-1.01257		1.15884		1.45942		2.18643	2.0457
S1pr3	1.39405		2.6685	2.18099	5.78075	3.34306	14.0163	5.34096	15.7251	5.89411	-1.14398		1.23826		2.64268	2.19119	5.01113	3.38265
Serpina3n	1.08709		1.01292		-1.06986		1.1931		1.21011		-1.16863		-1.04562		1.15741		1.12613
Smarca2	-1.06278		-1.24064		-1.31087		-1.58168		-1.2929		1.12562		1.00332		-1.16689		-1.45225
Synpo	-1.02343		1.40145	2.33176	1.33081		-1.18594	3.07614	-1.29725	3.60505	1.20178		1.04791		-1.1532		-1.21731
Tgfbi	1.16615		1.68		1.54924		2.41536	2.30593	2.45879	2.42821	-1.00292		1.12845		1.24846		2.12039	2.09305
Timp1	1.15582		2.04076	2.15106	3.57567	3.21616	4.68141	4.08113	3.15948	4.14053	-1.12071		1.12535		1.97014	2.05189	2.63848	2.3195
Tlr2	-1.08376		1.10329		1.50052		1.66511		1.31141		-1.18975		1.16665		1.55399		2.48204	2.47661
Tnc	1.71339		2.48619	2.37369	2.48468	2.32072	3.45361	3.14402	6.23394	4.63886	-1.07106		1.00336		1.28462		1.31367
Tnfrsf12a	1.35653		3.27633	2.65727	2.79003	2.54776	3.15957	3.12597	4.21754	4.29043	1.00107		1.13143		1.77394		2.4879	2.10439
Tnfrsf1a	1.19037		1.75974		1.19132		1.45498		1.72218		-1.01198		1.04037		1.31116		1.51082
Trem2	1.07631		1.10383		1.01856		1.2795		1.13912		-1.04269		1.12643		1.21213		1.36508
Ucp2	1.21625		1.31758		1.53977		1.93949		1.6955		1.04446		1.09551		1.11188		1.46037
Vcam1	-1.02121		2.01239	2.07289	2.33757	2.37469	3.14158	2.83558	3.16209	3.96071	1.02625		1.12416		1.278		1.77001	2.02412
		upregulated genes
		downregulated genes
		not regulated genes
		genes contradictory
